# Supplementary material for: Gradient-aligned Au/graphene meshes with confined heat at multiple levels for solar evaporation and anti-gravity catalytic conversion
Source: Royal Society of Chemistry journal article supplement (doi:10.1039/d0ta04986g), 2020-01-01
Supplement: d0ta04986g1.pdf [file d0ta04986g1.pdf]

Electronic Supplementary Information

**Gradient aligned Au/graphene meshes with confined heat at multiple levels for solar evaporation and anti-gravity catalytic conversion**

Xiangyu Meng,<sup>a</sup> Jianhui Yang,<sup>a</sup> Seeram Ramakrishna,<sup>b</sup> Yueming Sun<sup>a</sup> and Yunqian Dai<sup>\*,a</sup>

*<sup>a</sup> School of Chemistry and Chemical Engineering, Southeast University, Nanjing, Jiangsu 211189, P. R. China*

*<sup>b</sup> Center for Nanofibers and Nanotechnology, Department of Mechanical Engineering, National University of Singapore, Singapore 117574, Singapore*

*\*Address corresponding to: [daiy@seu.edu.cn](mailto:daiy@seu.edu.cn)*

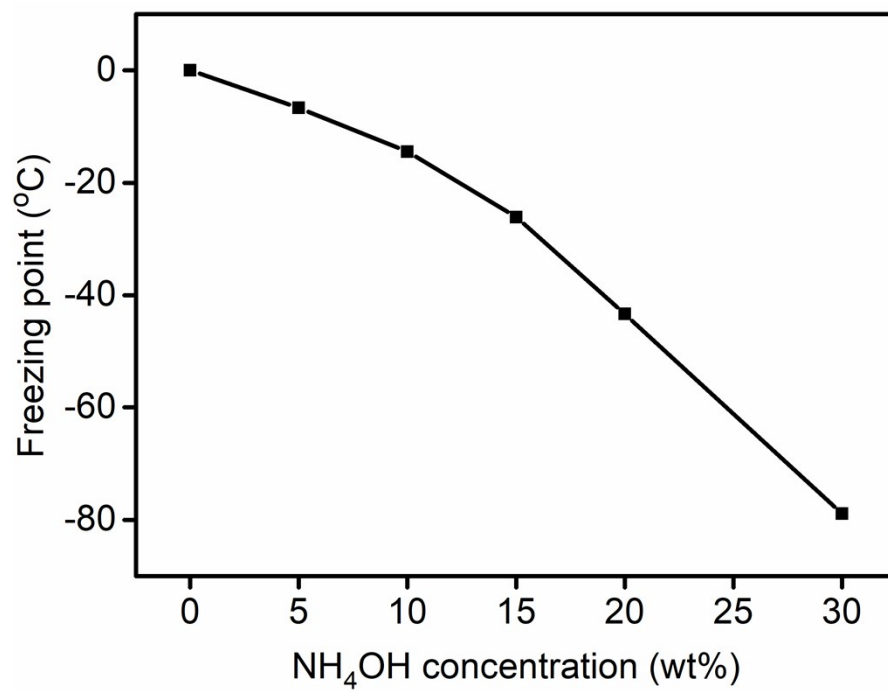

**Fig. S1** Relationship curve between typical  $\text{NH}_4\text{OH}$  concentrations and freezing points.

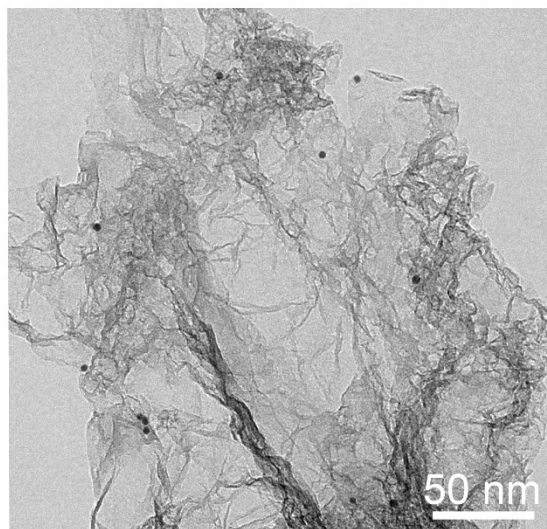

**Fig. S2** TEM image of Au/N-RGO mesh taken from the aerogel.

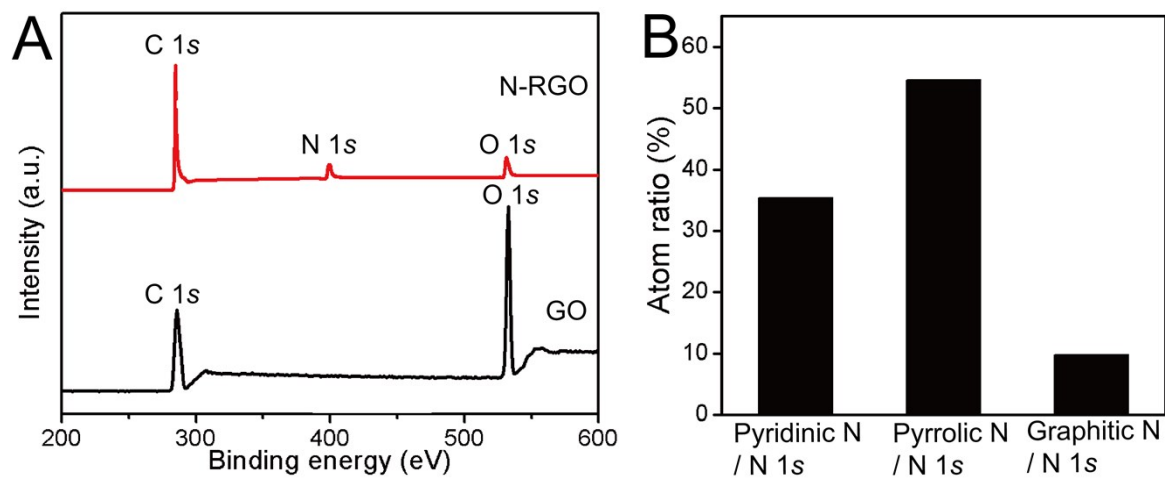

**Fig. S3** (A) Full XPS spectra of N-RGO aerogel and pristine GO. (B) The peak area ratio of pyridinic N, pyrrolic N and graphitic N to all N 1s.

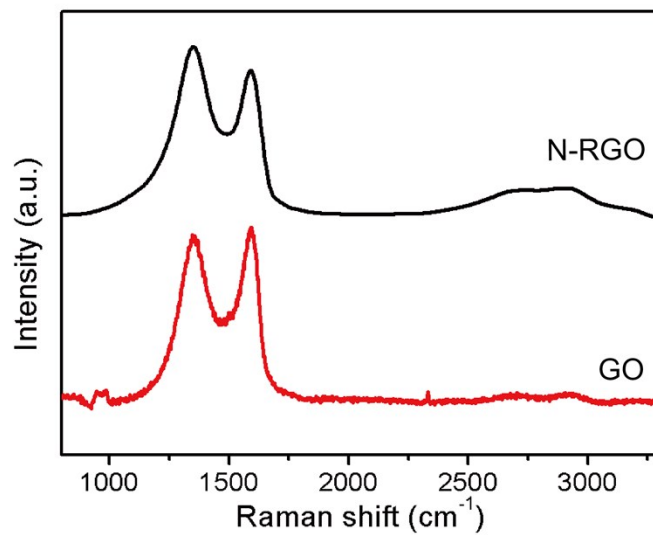

**Fig. S4** Raman spectra of N-RGO aerogel and pristine GO.

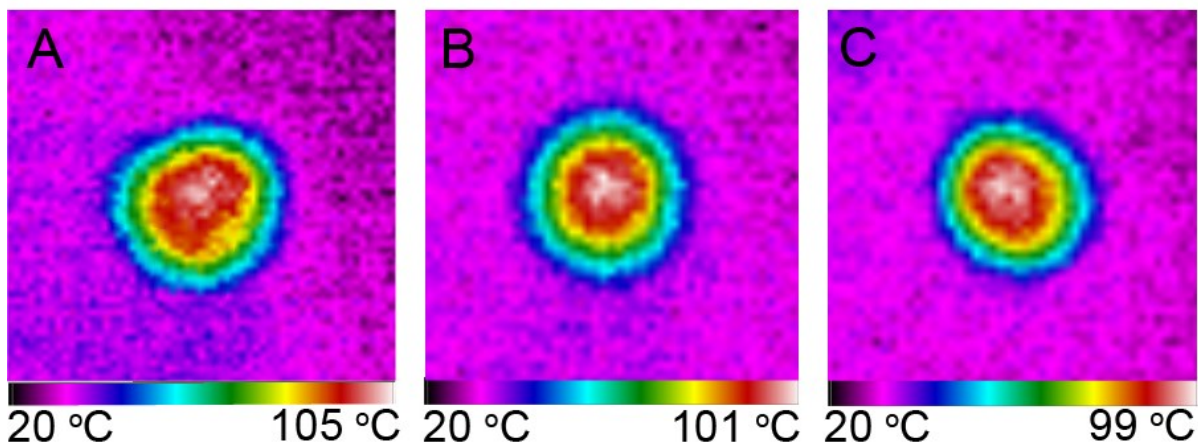

**Fig. S5** Comparison of infrared image recorded the temperature of ring-like Au/N-RGO (A) with gradient (B) with uniform and small-sized channels, and (C) with uniform and large-sized channels after light irradiation ( $2 \text{ kW}\cdot\text{m}^{-2}$ ) for 1 hour.

## Supplementary Note

**Note S1.** The calculation of photothermal conversion efficiency.

Notably, as the temperature reaches equilibrium, the input thermal energy converted from light, is regarded as equal to the heat flowing among the exposed surface of Au/N-RGO aerogel and the surrounding. Herein, the photothermal conversion efficiency ( $E$ ) can be calculated from equation S1:<sup>[1]</sup>

$$E = \frac{h \cdot (T_2 - T_1)}{\rho_L} \quad (1)$$

where  $h$  is the convection heat transfer coefficient ( $\text{W} \cdot \text{m}^{-2} \cdot \text{K}^{-1}$ ),  $T_2$  and  $T_1$  are the weighted average temperatures of Au/N-RGO aerogel after and before light irradiation (K), respectively. The temperature was recorded from infrared images.  $\rho_L$  is the light power density ( $\text{W} \cdot \text{m}^{-2}$ ). In this work,  $h = 25 \text{ W} \cdot \text{m}^{-2} \cdot \text{K}^{-1}$ ,  $\rho_L = 2 \text{ kW} \cdot \text{m}^{-2}$ .

**Table S1.** Comparison of the photothermal conversion efficiency.

| Materials                            | Photothermal conversion efficiency (%) | Light intensity (kW·m <sup>-2</sup> ) | Reference |
|--------------------------------------|----------------------------------------|---------------------------------------|-----------|
| Gradient ring-like Au/N-RGO          | 80.0                                   | 2                                     | This work |
| Oxygen plasma treated graphene       | 53.5                                   | 3                                     | [2]       |
| Hierarchical graphene                | 69.2                                   | 3                                     | [3]       |
| Carbonized mushroom                  | 42.5                                   | 1                                     | [4]       |
| Nickel/Cobalt/Polydopamine           | 32.2                                   | 1                                     | [5]       |
| Au/Polyacrylonitrile                 | 30.0                                   | 1                                     | [6]       |
| Hydroxyapatite/Polydopamine/Chitosan | 60.0                                   | 1                                     | [7]       |

Data were given or calculated in the respective references.



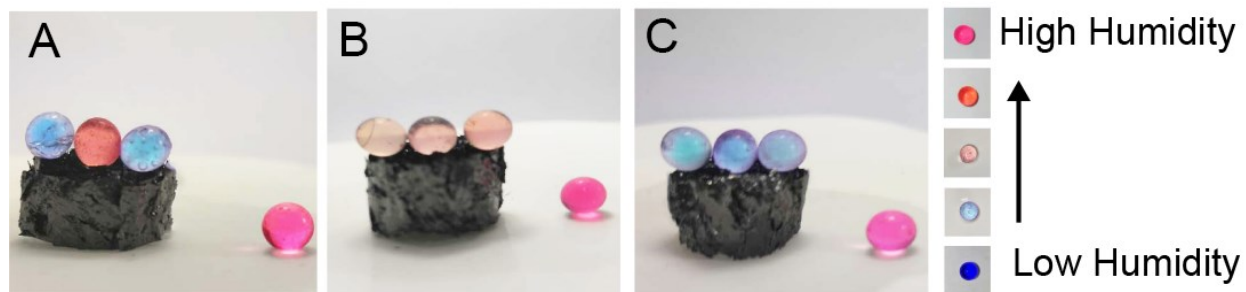

**Fig. S6** Concentrated water pumping in the center of (A) the ring-like Au/N-RGO aerogel with gradient microchannels, which was not observed in (B) the ring-like Au/N-RGO aerogel with uniform and small-sized microchannels, or (C) the ring-like Au/N-RGO aerogel with uniform and large-sized microchannels. The right inset showed the color reference images of anhydrous silicon spheres under different relative humidity conditions.

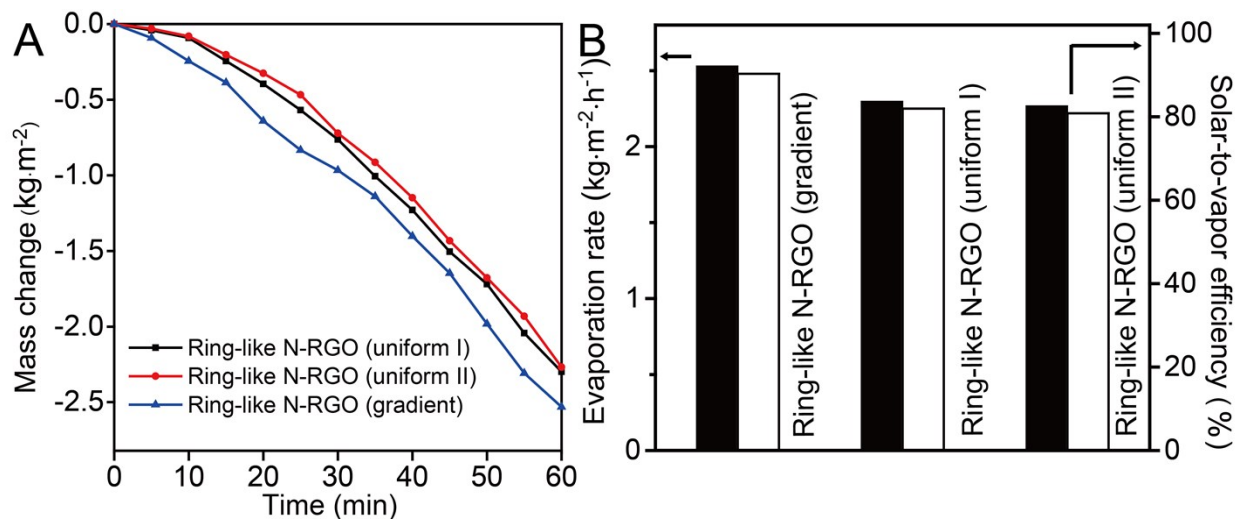

**Fig. S7** The mass change as a function of evaporation time, (B) the evaporation rate (black bar) and the solar-to-vapor conversion efficiency (white bar) of ring-like N-RGO aerogels with or without gradient. “Gradient” represented gradient channels, “uniform I” represented the uniform and small-sized channels, “uniform II” represented the uniform and large-sized channels.

**Note S2.** The calculation of energy gained from environment.

As shown in Fig. S3, the exposed side surface had a lower temperature than that of surrounding, which could gain energy from the surrounding. The energy ( $E$ ) gained from environment can be calculated by the following equation S2:<sup>[8]</sup>

$$E = -A_{\text{side}} \cdot \varepsilon \cdot \sigma (T_{\text{side}}^4 - T_s^4) - A_{\text{side}} \cdot h (T_{\text{side}} - T_s) \quad (2)$$

where  $A_{\text{side}}$  is the side wall surface area,  $T_{\text{side}}$  is the average temperature of side surface,  $T_s$  is the surrounding temperature,  $\varepsilon$  is emissivity of the graphene absorber,  $\sigma$  is the Stefan–Boltzmann constant, and  $h$  is the average convection heat transfer coefficient. In this work, the energy of N-RGO evaporator gained from environment was 30.03 mW.

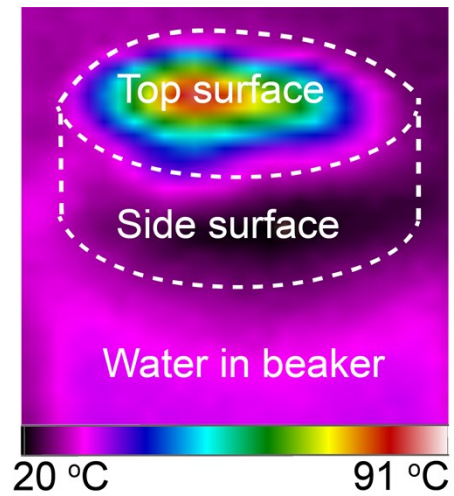

**Fig. S8** The infrared image of ring-like Au/N-RGO aerogel during water evaporation. The white circles highlight the boundary lines of different parts.

**Table S2.** Comparison of the solar-to-vapor conversion efficiency.

| Materials                          | Solar-to-vapor conversion efficiency (%) | Light intensity (kW·m <sup>-2</sup> ) | Reference |
|------------------------------------|------------------------------------------|---------------------------------------|-----------|
| Gradient ring-like Au/N-RGO        | 97.1                                     | 2                                     | This work |
| Au/anodized aluminum oxide         | 57.0                                     | 20                                    | [9]       |
| Au/bacterial nanocellulose aerogel | 76.3                                     | 51                                    | [10]      |
| Ag/PVDF                            | 29.6                                     | 23                                    | [11]      |
| Graphene sponge                    | 89.6                                     | 1                                     | [12]      |
| 3D graphene                        | 87.0                                     | 1                                     | [13]      |
| Carbon nanofiber/Carbon nanotube   | 88.5                                     | 2                                     | [14]      |
| Wood/Carbon nanotubes              | 85.3                                     | 2                                     | [15]      |

PVDF represents the polyvinylidene fluoride. Data were given or calculated in the respective references.

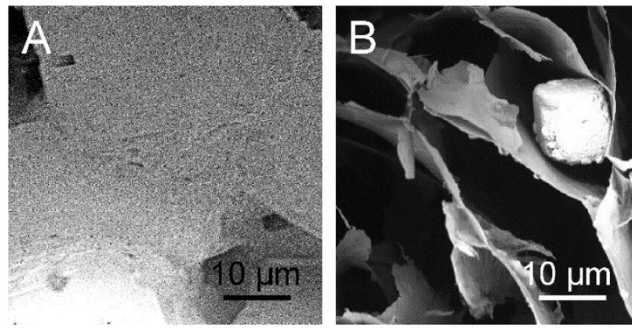

**Fig. S9** SEM images showing the change of preplaced NaCl on top surface of (A) honeycomb-like Au/ aerogel and (B) ring-like Au/ N-RGO aerogel after evaporation for one hour.

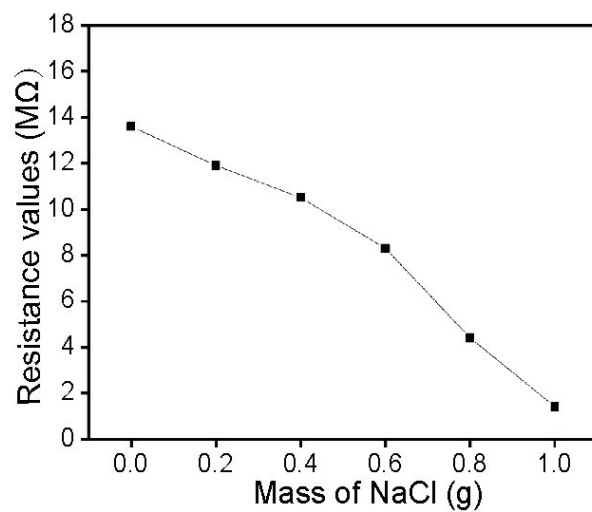

**Fig. S10** The relationship between electrical resistance of NaCl aqueous solution against the adding mass of NaCl into the simulated salty water.

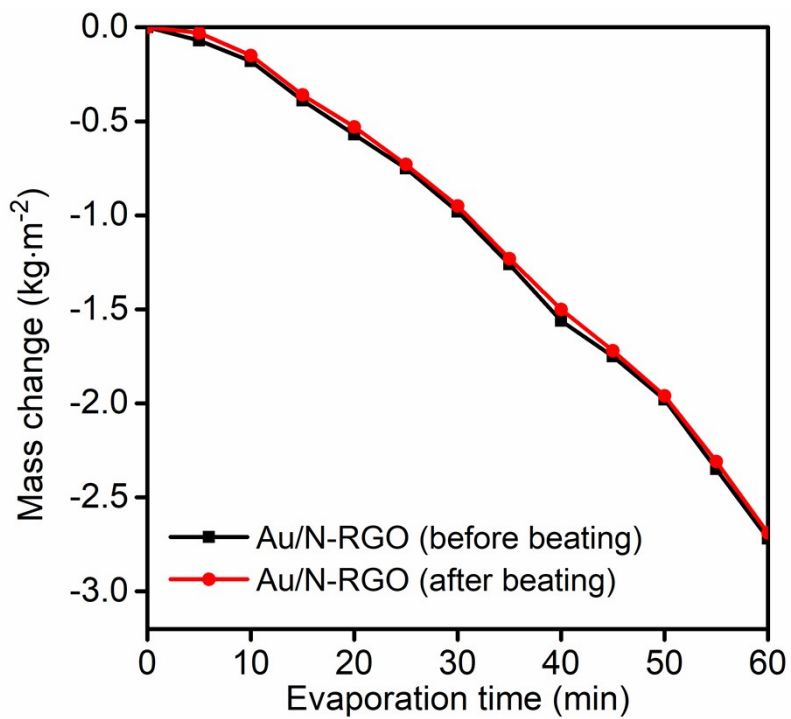

**Fig. S11** The mass change as a function of evaporation time, recording the water evaporation performance achieved by gradient ring-like Au/N-RGO aerogels before and after the simulated beating for 30 min.



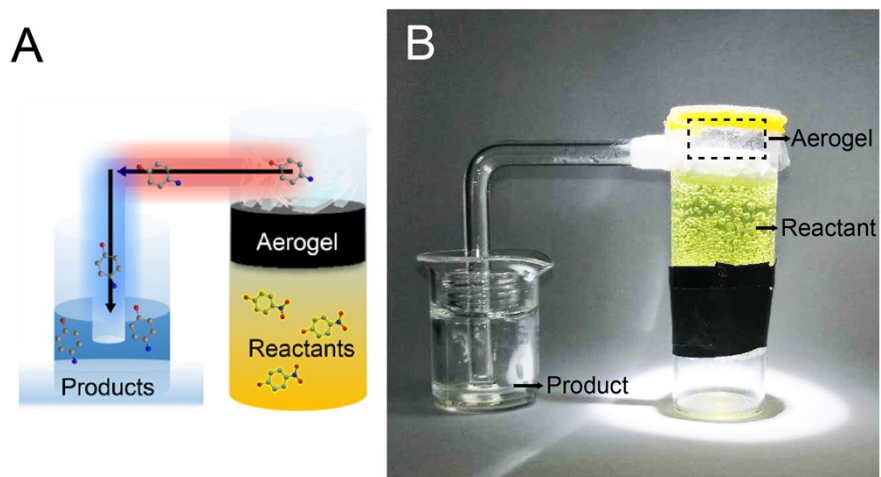

**Fig. S12** (A) The schematic illustration and (B) optical image of the setup for self-pumping chemical conversion reaction.

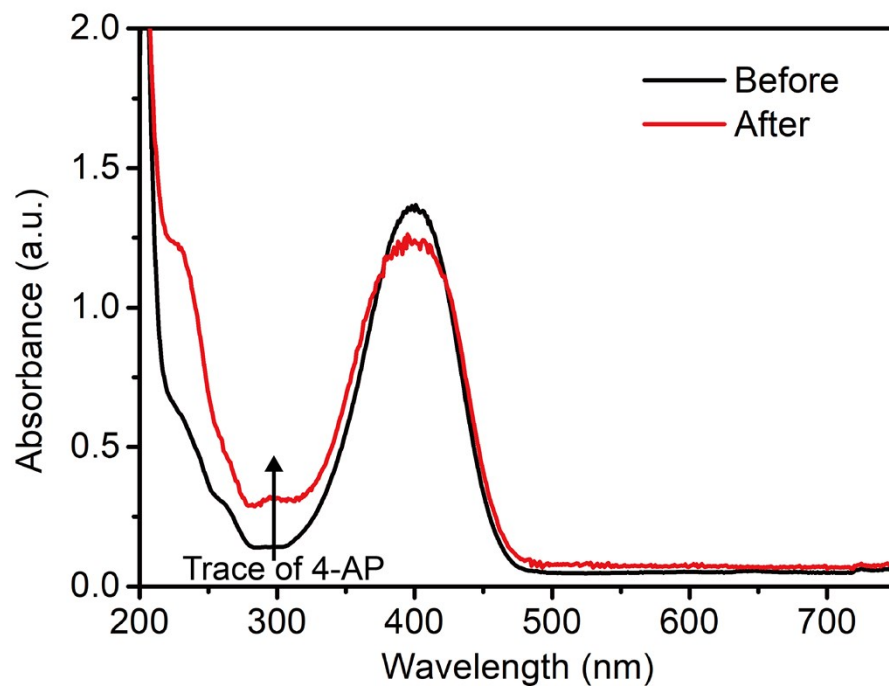

**Fig. S13** The comparison of bulky water before and after anti-gravity catalyzing. The arrows highlighted the trace number of 4-aminophenol (4-AP) products.

## References

- 1 M. Weng, P. Zhou, L. Chen, L. Zhang, W. Zhang, Z. Huang, C. Liu and S. Fan, *Adv. Funct. Mater.*, 2016, **26**, 7244–7253.
- 2 M. Gaboardi, A. Bliersbach, G. Bertoni, M. Aramini, G. Vlahopoulou, D. Pontiroli, P. Mauron, G. Magnani, G. Salviati, A. Züttel and M. Riccò, *J. Mater. Chem. A*, 2014, **2**, 1039–1046.
- 3 K. Liu, Q. Jiang, S. Tadepalli, R. Raliya, P. Biswas, R. Naik and S. Singamaneni, *ACS Appl. Mater. Interfaces*, 2017, **9**, 7675–7681.
- 4 N. Xu, X. Hu, W. Xu, X. Li, L. Zhou, S. Zhu and J. Zhu, *Adv. Mater.*, 2017, **29**, 1606762.
- 5 B. Shao, Y. Wang, X. Wu, Y. Lu, X. Yang, G. Y. Chen, G. Owens and H. Xu, *J. Mater. Chem. A*, 2020, **8**, 11665–11673.
- 6 Z. Huang, S. Li, X. Cui, Y. Wan, Y. Xiao, S. Tian, H. Wang, X. Li, Q. Zhao and C. S. Lee, *J. Mater. Chem. A*, 2020, **8**, 10742–10746.
- 7 S. Cao, X. Wu, Y. Zhu, R. Gupta, A. Tan, Z. Wang, Y. S. Jun and S. Singamaneni, *J. Mater. Chem. A*, 2020, **8**, 5147–5156.
- 8 X. Li, J. Li, J. Lu, N. Xu, C. Chen, X. Min, B. Zhu, H. Li, L. Zhou, S. Zhu, T. Zhang and J. Zhu, *Joule*, 2018, **2**, 1331–1338.
- 9 K. Bae, G. Kang, S. Cho, W. Park, K. Kim and W. Padilla, *Nat. Commun.*, 2015, **6**, 10103–10111.
- 10 L. Tian, J. Luan, K. Liu, Q. Jiang, S. Tadepalli, M. Gupta, R. Naik and S. Singamaneni, *Nano Lett.*, 2016, **16**, 609–616.
- 11 A. Politano, P. Argurio, G. Profio, V. Sanna, A. Cupolillo, S. Chakraborty, H. Arafat and E. Curcio, *Adv. Mater.*, 2017, **29**, 1603504.
- 12 L. Cui, P. Zhang, Y. Xiao, Y. Liang, H. Liang, Z. Cheng and L. Qu, *Adv. Mater.*, 2018, **30**, 1706805.
- 13 Y. Yang, R. Zhao, T. Zhang, K. Zhao, P. Xiao, Y. Ma, P. Ajayan, G. Shi and Y. Chen, *ACS Nano*, 2018, **12**, 829–835.

- 14 H. Ren, M. Tang, B. Guan, K. Wang, J. Yang, F. Wang, M. Wang, J. Shan, Z. Chen, D. Wei, H. Peng and Z. Liu, *Adv. Mater.*, 2017, **29**, 1702590–1702596.
- 15 F. Jiang, H. Liu, Y. Li, Y. Kuang, X. Xu, C. J. Chen, H. Huang, C. Jia, X. Zhao, E. Hitz, Y. Zhou, R. Yang, L. Cui and L. Hu, *ACS Appl. Mater. Interfaces*, 2018, **10**, 1104–1112.
